# Supplementary material for: Starting from scratch: Step-by-step development of diagnostic tests for SARS-CoV-2 detection by RT-LAMP
Source: PLoS One. 2023 Jan 26;18(1):e0279681. doi: 10.1371/journal.pone.0279681 (PMC9879405; doi:10.1371/journal.pone.0279681)
Supplement: S1 File — (XLSX) [file pone.0279681.s008.xlsx]

## Sheet: Data
SARS-CoV-2 detection by RT-qPCR (CDC and Berlin protocol-based methodologies) and colorimetric end-point RT-LAMP in saliva samples
Sample	RT-qPCR (CDC)		RT-qPCR (Berlin)		Colorimetric RT-LAMP
	RP	N1	RdRp_SARSr-P1	RdRp_SARSr-P2	RP	N1
Sample 15	27.2481	17.7132	19.7687	16.6812	+	+
Sample 04	29.0658	19.4022	21.9143	18.7393	+	+
Sample 71	27.8222	22.1107	24.3625	21.8069	+	+
Sample 55	24.9004	22.1775	24.7067	21.4684	+	+
Sample 11	26.2907	21.6453	24.8792	21.9272	+	+
Sample 35	28.3677	22.3433	25.0173	21.9219	+	+
Sample 54	26.6043	23.4789	25.7934	22.4933	+	+
Sample 65	30.0425	21.6129	25.9976	22.4795	+	+
Sample 94	29.0893	22.2373	26.7028	23.2846	+	+
Sample 98	26.8856	24.762	27.9327	25.1131	+	+
Sample 23	30.6263	24.7973	28.3214	25.3869	+	+
Sample 59	27.9599	25.3348	28.4559	25.3052	+	+
Sample 58	26.8243	25.322	28.467	25.639	+	+
Sample 73	31.9262	26.0031	28.6293	25.6269	+	+
Sample 84	26.4539	24.8776	29.1416	25.8019	+	+
Sample 85	26.5666	27.1513	29.4964	26.8492	+	+
Sample 03	27.3638	27.6325	29.7656	27.1443	+	+
Sample 25	27.3724	25.2851	30.0095	27.3084	+	+
Sample 30	27.4963	27.4512	31.6	28.7048	+	+
Sample 81	28.9003	28.5229	31.7939	28.4973	+	+
Sample 75	28.8627	28.758	32.061	28.824	+	+
Sample 46	28.8887	29.4828	32.1535	28.8402	+	+
Sample 97	27.7129	29.2152	32.187	30.0056	+	+
Sample 89	28.626	27.4503	32.3989	29.1462	+	+
Sample 62	27.2646	31.0166	32.9572	30.5548	+	-
Sample 07	27.6912	29.0042	33.0249	29.9974	+	+
Sample 83	28.1005	30.1735	33.4795	30.6009	+	+
Sample 21	28.9629	31.1865	34.305	31.6082	+	-
Sample 60	26.2333	32.7393	35.0187	31.5797	+	-
Sample 67	29.3098	33.3148	35.3343	32.8491	+	-
Sample 33	28.3065	31.2251	35.3415	33.0089	+	-
Sample 63	29.0342	34.7828	35.8344	Undetermined	+	-
Sample 88	26.4475	32.0368	36.5496	34.4987	+	-
Sample 80	27.2089	34.9909	36.9121	Undetermined	+	-
Sample 17	27.1385	35.8576	36.9159	Undetermined	+	-
Sample 70	30.772	34.6278	36.9473	Undetermined	+	-
Sample 79	28.21	38.7015	37.3598	Undetermined	+	-
Sample 34	27.9134	Undetermined	39.3124	Undetermined	+	-
NTC	Undetermined	Undetermined	Undetermined	Undetermined	-	-
NTC	Undetermined	Undetermined	Undetermined	Undetermined	-	-
Sample 01	28.2349	37.9689	Undetermined	Undetermined	+	-
Sample 02	26.5989	Undetermined	Undetermined	Undetermined	+	-
Sample 05	27.1218	Undetermined	Undetermined	Undetermined	+	-
Sample 06	28.1455	Undetermined	Undetermined	Undetermined	+	-
Sample 08	26.9845	Undetermined	Undetermined	Undetermined	+	-
Sample 09	28.0104	36.5859	Undetermined	Undetermined	+	-
Sample 10	26.711	Undetermined	Undetermined	Undetermined	+	-
Sample 12	27.6598	Undetermined	Undetermined	Undetermined	+	-
Sample 13	28.2541	Undetermined	Undetermined	Undetermined	+	-
Sample 14	27.2359	Undetermined	Undetermined	Undetermined	+	-
Sample 16	27.6904	Undetermined	Undetermined	Undetermined	+	-
Sample 18	26.4717	Undetermined	Undetermined	Undetermined	+	-
Sample 19	28.2575	Undetermined	Undetermined	Undetermined	+	-
Sample 20	29.6778	38.3316	Undetermined	Undetermined	+	-
Sample 22	27.0776	Undetermined	Undetermined	Undetermined	+	-
Sample 24	27.006	37.8831	Undetermined	Undetermined	+	-
Sample 26	28.7567	36.0588	Undetermined	Undetermined	+	-
Sample 27	26.9196	32.6945	Undetermined	36.1917	+	-
Sample 28	28.1887	36.7779	Undetermined	37.1584	+	-
Sample 29	25.2854	37.9855	Undetermined	Undetermined	+	-
Sample 31	27.4525	35.5018	Undetermined	Undetermined	+	-
Sample 32	28.2563	Undetermined	Undetermined	Undetermined	+	-
Sample 36	28.672	37.6167	Undetermined	Undetermined	+	-
Sample 37	25.7331	37.6502	Undetermined	Undetermined	+	-
Sample 38	28.8938	Undetermined	Undetermined	Undetermined	+	-
Sample 39	28.63	34.7192	Undetermined	Undetermined	+	-
Sample 40	28.7379	Undetermined	Undetermined	Undetermined	+	-
Sample 41	26.4399	Undetermined	Undetermined	Undetermined	+	-
Sample 42	28.8649	Undetermined	Undetermined	Undetermined	+	-
Sample 43	28.646	37.6297	Undetermined	Undetermined	+	-
Sample 44	27.8193	Undetermined	Undetermined	Undetermined	+	-
Sample 45	26.7346	Undetermined	Undetermined	Undetermined	+	-
Sample 47	26.7389	Undetermined	Undetermined	Undetermined	+	-
Sample 48	26.0432	Undetermined	Undetermined	Undetermined	+	-
Sample 49	28.7525	38.4085	Undetermined	Undetermined	+	-
Sample 50	27.191	Undetermined	Undetermined	Undetermined	+	-
Sample 51	27.0152	36.5755	Undetermined	Undetermined	+	-
Sample 52	28.7545	Undetermined	Undetermined	Undetermined	+	-
Sample 53	28.5989	Undetermined	Undetermined	Undetermined	+	-
Sample 56	27.5768	Undetermined	Undetermined	Undetermined	+	-
Sample 57	29.8165	37.3874	Undetermined	Undetermined	+	-
Sample 61	28.3768	37.5677	Undetermined	Undetermined	+	-
Sample 64	25.8781	Undetermined	Undetermined	Undetermined	+	-
Sample 66	27.9892	Undetermined	Undetermined	Undetermined	+	-
Sample 68	29.6471	Undetermined	Undetermined	Undetermined	+	-
Sample 69	30.4019	Undetermined	Undetermined	Undetermined	+	-
Sample 72	26.4542	Undetermined	Undetermined	Undetermined	+	-
Sample 74	30.7561	37.6285	Undetermined	Undetermined	+	-
Sample 76	27.7042	Undetermined	Undetermined	Undetermined	+	-
Sample 77	28.0144	Undetermined	Undetermined	Undetermined	+	-
Sample 78	31.6573	Undetermined	Undetermined	Undetermined	+	-
Sample 82	27.5993	36.6057	Undetermined	Undetermined	+	-
Sample 86	26.9485	Undetermined	Undetermined	Undetermined	+	-
Sample 87	27.3255	Undetermined	Undetermined	Undetermined	+	-
Sample 90	27.2609	Undetermined	Undetermined	Undetermined	+	-
Sample 91	26.7878	Undetermined	Undetermined	Undetermined	+	-
Sample 92	28.4979	Undetermined	Undetermined	Undetermined	+	-
Sample 93	27.8393	Undetermined	Undetermined	Undetermined	+	-
Sample 95	27.0204	33.0863	Undetermined	Undetermined	+	-
Sample 96	27.8496	36.1066	Undetermined	Undetermined	+	-
Sample 99	31.9133	Undetermined	Undetermined	Undetermined	+	-
Sample 100	27.6252	35.9892	Undetermined	Undetermined	+	-
